# Supplementary material for: Ciprofloxacin resistance in community- and hospital-acquired Escherichia coli urinary tract infections: a systematic review and meta-analysis of observational studies
Source: PubMed Central journal article supplement (PMC4660780; doi:10.1186/s12879-015-1282-4), 2015-11-25
Supplement: 12879_2015_1282_MOESM3_ESM.pdf [file 12879_2015_1282_MOESM3_ESM.pdf]

**Additional file 3: Subgroup analyses of pooled ciprofloxacin resistance by setting**

| Subgroup       |                                                   | Community Setting<br>N=51 | Hospital setting<br>N=3 | <i>P</i> value* |
|----------------|---------------------------------------------------|---------------------------|-------------------------|-----------------|
|                |                                                   | Pooled resistance         | Pooled resistance       |                 |
| Risk of bias   | Low and unclear C=28 studies<br>H= 0 study        | 0.221                     | -                       | -               |
|                | High C=23 studies<br>H=3 studies                  | 0.337 (10262)             | 0.385                   | <0.0001         |
| Study duration | ≤12 months<br>C=25 studies<br>H=0 study           | 0.323                     | -                       | -               |
|                | >12months<br>C=24 studies<br>H=3 studies          | 0.219 (34328)             | 0.385                   | <0.0001         |
| Study design   | Cross sectional<br>C=40 studies<br>H=3 studies    | 0.271 (36909)             | 0.385                   | <0.0001         |
|                | Cohort<br>C=5 studies<br>H=0 study                | 0.287                     | -                       | -               |
|                | Case control<br>C=2 studies<br>H=0 study          | 0.224                     | -                       | -               |
| Economy        | Developed<br>C=16 studies<br>H=1 study            | 0.141 (12996)             | 0.407                   | <0.0001         |
|                | Developing<br>C=35 studies<br>H=1 study           | 0.345 (32064)             | 0.400                   | 0.103           |
| Region         | Africa<br>C=7 studies<br>H=0 study                | 0.203                     | -                       | -               |
|                | Asia and Middle East<br>C=22 studies<br>H=1 study | 0.390 (8866)              | 0.400**                 | 0.774           |
|                | Europe<br>C=13 studies<br>H=0 study               | 0.156                     | -                       | -               |
|                | North and South America                           | 0.207 (24871)             | 0.407**                 | <0.0001         |

|              |                                                                    |               |       |         |
|--------------|--------------------------------------------------------------------|---------------|-------|---------|
|              | C=9 studies<br>H=1 study                                           |               |       |         |
| Age group    | Adults and children †<br>C=24 studies<br>H=2 studies               | 0.265 (33090) | 0.382 | <0.0001 |
|              | Adults only<br>C=19 studies<br>H=0 study                           | 0.302         | -     | -       |
| UTI symptoms | Symptomatic and asymptomatic patients<br>C=11 studies<br>H=1 study | 0.185 (27984) | 0.380 | <0.0001 |
|              | Symptomatic patients only<br>C=40 studies<br>H=2 studies           | 0.295 (17076) | 0.404 | <0.0001 |
| Overall      |                                                                    | 0.27          | 0.38  | <0.0001 |

\*Comparing pooled resistance for difference in subgroup in community and hospital settings

†Studies reporting resistance in adults and children or children only

C= number of studies reporting on community acquired UTI

H= number of studies reporting on hospital acquired UTI

\*\*Middle East only; North America only
