# Supplementary material for: Ciprofloxacin resistance in community- and hospital-acquired Escherichia coli urinary tract infections: a systematic review and meta-analysis of observational studies
Source: Springer Nature journal article supplement (doi:10.1186/s12879-015-1282-4), 2015-11-25
Supplement: MOESM1 [file 9740576]

## ADDITIONAL FILES

### Additional file 1: Search strategy by database

EMBASE Search strategy 1: Keywords only

| # | Searches                    | Results |
|---|-----------------------------|---------|
| 1 | resistance.mp.              | 798263  |
| 2 | urinary tract infection.mp. | 80151   |
| 3 | Escherichia coli.mp.        | 358062  |
| 4 | 1 and 2 and 3               | 3709    |
| 5 | 4 and 2004:2014.(sa_year).  | 2423    |

EMBASE Search strategy 2: Keywords and subject headings

| #  | Searches                                                                                                                                                                               | Results |
|----|----------------------------------------------------------------------------------------------------------------------------------------------------------------------------------------|---------|
| 1  | antibiotic resistan*.mp. [mp=title, abstract, subject headings, heading word, drug trade name, original title, device manufacturer, drug manufacturer, device trade name, keyword]     | 123069  |
| 2  | antimicrobial resistan*.mp. [mp=title, abstract, subject headings, heading word, drug trade name, original title, device manufacturer, drug manufacturer, device trade name, keyword]  | 12903   |
| 3  | drug resistan*.mp. [mp=title, abstract, subject headings, heading word, drug trade name, original title, device manufacturer, drug manufacturer, device trade name, keyword]           | 114373  |
| 4  | bacterial resistan*.mp. [mp=title, abstract, subject headings, heading word, drug trade name, original title, device manufacturer, drug manufacturer, device trade name, keyword]      | 5524    |
| 5  | antibiotic resistance/                                                                                                                                                                 | 114397  |
| 6  | drug resistance/                                                                                                                                                                       | 58485   |
| 7  | 1 or 2 or 3 or 4 or 5 or 6                                                                                                                                                             | 225773  |
| 8  | urinary tract infection*.mp. [mp=title, abstract, subject headings, heading word, drug trade name, original title, device manufacturer, drug manufacturer, device trade name, keyword] | 83408   |
| 9  | uti.mp. [mp=title, abstract, subject headings, heading word, drug trade name, original title, device manufacturer, drug manufacturer, device trade name, keyword]                      | 9689    |
| 10 | bacteriuria.mp. [mp=title, abstract, subject headings, heading word, drug trade name, original title, device manufacturer, drug manufacturer, device trade name, keyword]              | 10917   |
| 11 | pyuria.mp. [mp=title, abstract, subject headings, heading word, drug trade name, original title, device manufacturer, drug manufacturer, device trade name, keyword]                   | 3890    |
| 12 | urinary tract infection/                                                                                                                                                               | 75810   |
| 13 | bacteriuria/                                                                                                                                                                           | 8487    |
| 14 | pyuria/                                                                                                                                                                                | 3150    |
| 15 | 8 or 9 or 10 or 11 or 12 or 13 or 14                                                                                                                                                   | 91929   |
| 16 | Escherichia coli.mp. [mp=title, abstract, subject headings, heading word, drug trade name, original title, device manufacturer, drug manufacturer, device trade name, keyword]         | 358062  |
| 17 | e coli.mp. [mp=title, abstract, subject headings, heading word, drug trade name, original title, device manufacturer, drug manufacturer,                                               | 125639  |

|    |                             |        |
|----|-----------------------------|--------|
|    | device trade name, keyword] |        |
| 18 | Escherichia coli/           | 294320 |
| 19 | 16 or 17 or 18              | 371005 |
| 20 | 7 and 15 and 19             | 3284   |
| 21 | 20 and 2004:2014.(sa_year). | 2160   |

CINAHL Search strategy 1: Keywords only

| # | Searches                                    | Results |
|---|---------------------------------------------|---------|
| 1 | resistance                                  | 55753   |
| 2 | urinary tract infection                     | 7192    |
| 3 | escherichia coli                            | 4970    |
| 4 | 1 AND 2 AND 3                               | 235     |
| 5 | 4 Limiters-Published date 20040101-20141231 | 208     |

CINAHL Search strategy 2: Keywords and subject headings

| #  | Searches                                         | Results |
|----|--------------------------------------------------|---------|
| 1  | antibiotic resistan*                             | 4759    |
| 2  | antimicrobial resistan*                          | 3316    |
| 3  | drug resistan*                                   | 33393   |
| 4  | bacterial resistan*                              | 6765    |
| 5  | (MH "Drug Resistance, Microbial")                | 12164   |
| 6  | (MH "Drug Resistance")                           | 4838    |
| 7  | 1 OR 2 OR 3 OR 4 OR 5 OR 6                       | 36416   |
| 8  | urinary tract infection*                         | 7781    |
| 9  | uti                                              | 1081    |
| 10 | bacteriuria                                      | 740     |
| 11 | pyuria                                           | 129     |
| 12 | (MH "Urinary Tract Infections")                  | 5924    |
| 13 | (MH "Bacteriuria")                               | 518     |
| 14 | 8 OR 9 OR 10 OR 11 OR 12 OR 13                   | 8169    |
| 15 | escherichia coli                                 | 4970    |
| 16 | e coli                                           | 1428    |
| 17 | (MH "Escherichia Coli")                          | 2722    |
| 18 | 15 OR 16 OR 17                                   | 5191    |
| 19 | 7 AND 14 AND 18                                  | 270     |
| 20 | 19; Limiters – Published Date: 20040101-20141231 | 236     |

SCOPUS Search strategy 1: Keywords only

| # | Searches                                                                                                                                                                | Results   |
|---|-------------------------------------------------------------------------------------------------------------------------------------------------------------------------|-----------|
| 1 | TITLE-ABS-KEY ( resistance )                                                                                                                                            | 1,406,458 |
| 2 | TITLE-ABS-KEY ( urinary tract infection )                                                                                                                               | 87,237    |
| 3 | TITLE-ABS-KEY ( escherichia coli )                                                                                                                                      | 411,648   |
| 4 | ( TITLE-ABS-KEY ( resistance ) ) AND ( TITLE-ABS-KEY ( urinary tract infections ) ) AND ( TITLE-ABS-KEY ( escherichia coli ) )                                          | 4,353     |
| 5 | ( TITLE-ABS-KEY ( resistance ) ) AND ( TITLE-ABS-KEY ( urinary tract infections ) ) AND ( TITLE-ABS-KEY ( escherichia coli ) ) AND ( LIMIT-TO ( PUBYEAR , 2014-2004 ) ) | 2472      |

SCOPUS Search strategy 2: Keywords and subject headings

| #  | Searches                                  | Results |
|----|-------------------------------------------|---------|
| 1  | TITLE-ABS-KEY ( antibiotic resistan* )    | 186424  |
| 2  | TITLE-ABS-KEY ( antimicrobial resistan* ) | 56777   |
| 3  | TITLE-ABS-KEY ( drug resistan* )          | 507251  |
| 4  | TITLE-ABS-KEY ( bacterial resistan* )     | 181814  |
| 5  | 1 OR 2 OR 3 OR 4                          | 597338  |
| 6  | TITLE-ABS-KEY ( urinary tract infection ) | 87237   |
| 7  | TITLE-ABS-KEY ( uti )                     | 7656    |
| 8  | TITLE-ABS-KEY ( bacteriuria )             | 11141   |
| 9  | TITLE-ABS-KEY ( pyuria )                  | 3187    |
| 10 | 6 OR 7 OR 8 OR 9                          | 94035   |
| 11 | TITLE-ABS-KEY ( escherichia coli )        | 411648  |
| 12 | TITLE-ABS-KEY ( e coli )                  | 168002  |
| 13 | 11 OR 12                                  | 429893  |
| 14 | 5 AND 10 AND 13                           | 5184    |
| 15 | 14 AND ( LIMIT-TO ( PUBYEAR , 2014-2004 ) | 2777    |

PubMed Search strategy 1: Keywords only

| # | Searches                                                               | Results |
|---|------------------------------------------------------------------------|---------|
| 1 | Search resistance                                                      | 610335  |
| 2 | Search urinary tract infection                                         | 54,476  |
| 3 | Search escherichia coli                                                | 318047  |
| 4 | Search ((resistance) AND urinary tract infection) AND escherichia coli | 2,416   |
| 5 | 4 AND Filters: Publication date from 2004/01/01 to 2014/12/31          | 1243    |

PubMed Search strategy 2: Keywords and subject headings

| #  | Searches                                  | Results |
|----|-------------------------------------------|---------|
| 1  | Search antibiotic resistance              | 146589  |
| 2  | Search antimicrobial resistance           | 165154  |
| 3  | Search bacterial resistance               | 116736  |
| 4  | Search drug resistance                    | 375235  |
| 5  | Search "Drug Resistance, Microbial"[Mesh] | 125068  |
| 6  | Search "Drug Resistance, Bacterial"[Mesh] | 60535   |
| 7  | 1 OR 2 OR 3 OR 4 OR 5 OR 6                | 409413  |
| 8  | Search urinary tract infection            | 54469   |
| 9  | Search uti                                | 5705    |
| 10 | Search bacteriuria                        | 8749    |
| 11 | Search pyuria                             | 1976    |
| 12 | Search "Urinary Tract Infections"[Mesh]   | 38550   |
| 13 | Search "Bacteriuria"[Mesh]                | 6931    |
| 14 | Search "Pyuria"[Mesh]                     | 906     |
| 15 | 8 OR 9 OR 10 OR 11 OR 12 OR 13 OR 14      | 56345   |
| 16 | Search escherichia coli                   | 318008  |
| 17 | Search e coli                             | 333732  |
| 18 | Search "Escherichia coli"[Mesh]           | 232783  |
| 19 | 16 OR 17 OR 18                            | 333732  |
| 20 | 7 AND 15 AND 19                           | 2623    |

|    |                                                                |      |
|----|----------------------------------------------------------------|------|
| 21 | 20 AND Filters: Publication date from 2004/01/01 to 2014/12/31 | 1301 |
|----|----------------------------------------------------------------|------|

MEDLINE Search strategy 1: Keywords only

| # | Searches                     | Results |
|---|------------------------------|---------|
| 1 | resistance.mp.               | 574974  |
| 2 | urinary tract infections.mp. | 37313   |
| 3 | Escherichia coli.mp.         | 311661  |
| 4 | 1 and 2 and 3                | 1923    |
| 5 | 4 and 2004:2014. (sa_year)   | 964     |

MEDLINE Search strategy 2: Keywords and subject headings

| #  | Searches                                                                                                                                                                                                                               | Results |
|----|----------------------------------------------------------------------------------------------------------------------------------------------------------------------------------------------------------------------------------------|---------|
| 1  | antibiotic resistan*.mp. [mp=title, abstract, original title, name of substance word, subject heading word, keyword heading word, protocol supplementary concept word, rare disease supplementary concept word, unique identifier]     | 19772   |
| 2  | antimicrobial resistan*.mp. [mp=title, abstract, original title, name of substance word, subject heading word, keyword heading word, protocol supplementary concept word, rare disease supplementary concept word, unique identifier]  | 8841    |
| 3  | drug resistan*.mp. [mp=title, abstract, original title, name of substance word, subject heading word, keyword heading word, protocol supplementary concept word, rare disease supplementary concept word, unique identifier]           | 197925  |
| 4  | bacterial resistan*.mp. [mp=title, abstract, original title, name of substance word, subject heading word, keyword heading word, protocol supplementary concept word, rare disease supplementary concept word, unique identifier]      | 3438    |
| 5  | Drug Resistance, Microbial/                                                                                                                                                                                                            | 54415   |
| 6  | Drug Resistance/                                                                                                                                                                                                                       | 39696   |
| 7  | 1 or 2 or 3 or 4 or 5 or 6                                                                                                                                                                                                             | 208986  |
| 8  | urinary tract infection*.mp. [mp=title, abstract, original title, name of substance word, subject heading word, keyword heading word, protocol supplementary concept word, rare disease supplementary concept word, unique identifier] | 43114   |
| 9  | uti.mp. [mp=title, abstract, original title, name of substance word, subject heading word, keyword heading word, protocol supplementary concept word, rare disease supplementary concept word, unique identifier]                      | 5172    |
| 10 | bacteriuria.mp. [mp=title, abstract, original title, name of substance word, subject heading word, keyword heading word, protocol supplementary concept word, rare disease supplementary concept word, unique identifier]              | 8646    |
| 11 | pyuria.mp. [mp=title, abstract, original title, name of substance word, subject heading word, keyword heading word, protocol supplementary concept word, rare disease supplementary concept word, unique identifier]                   | 1890    |
| 12 | Urinary Tract Infections/                                                                                                                                                                                                              | 32461   |
| 13 | Bacteriuria/                                                                                                                                                                                                                           | 7048    |

|    |                                                                                                                                                                                                                                |        |
|----|--------------------------------------------------------------------------------------------------------------------------------------------------------------------------------------------------------------------------------|--------|
| 14 | Pyuria/                                                                                                                                                                                                                        | 925    |
| 15 | 8 or 9 or 10 or 11 or 12 or 13 or 14                                                                                                                                                                                           | 49102  |
| 16 | Escherichia coli.mp. [mp=title, abstract, original title, name of substance word, subject heading word, keyword heading word, protocol supplementary concept word, rare disease supplementary concept word, unique identifier] | 311661 |
| 17 | e coli.mp. [mp=title, abstract, original title, name of substance word, subject heading word, keyword heading word, protocol supplementary concept word, rare disease supplementary concept word, unique identifier]           | 120235 |
| 18 | Escherichia coli/                                                                                                                                                                                                              | 227408 |
| 19 | 16 or 17 or 18                                                                                                                                                                                                                 | 324796 |
| 20 | 7 and 15 and 19                                                                                                                                                                                                                | 1886   |
| 21 | 20 and 2004:2014.(sa_year).                                                                                                                                                                                                    | 933    |

### COCHRANE Search strategy

#### Cochrane Database of Systematic Reviews

| # | Searches                                                                                  | Cochrane reviews |
|---|-------------------------------------------------------------------------------------------|------------------|
| 1 | resistance in Title, Abstract, Keywords (Word variations have been searched)              | 263              |
| 2 | urinary tract infection in Title, Abstract, Keywords (Word variations have been searched) | 77               |
| 3 | Escherichia coli in Title, Abstract, Keywords (Word variations have been searched)        | 3                |
| 4 | 1 and 2 and 3                                                                             | 1                |
| 5 | 4 and Publication Year from 2004 to 2014 (Word variations have been searched)             | 1                |
