# Supplementary material for: Ciprofloxacin resistance in community- and hospital-acquired Escherichia coli urinary tract infections: a systematic review and meta-analysis of observational studies
Source: Springer Nature journal article supplement (doi:10.1186/s12879-015-1282-4), 2015-11-25
Supplement: MOESM2 [file 9740576]

**Additional file 2: Subgroup analyses of pooled ciprofloxacin resistance in hospital setting**

| Subgroup     |                                                    | Hospital setting<br>N=3 | <i>P</i> value* |
|--------------|----------------------------------------------------|-------------------------|-----------------|
|              |                                                    | Pooled resistance       |                 |
| Region       | Middle East<br>n=1 study                           | 0.400**                 | 0.880           |
|              | North America<br>n=1 study                         | 0.407**                 |                 |
| Economy      | Developed<br>n=1 study                             | 0.407                   | 0.880           |
|              | Developing<br>n=1 study                            | 0.400                   |                 |
| UTI symptoms | Symptomatic and asymptomatic patients<br>n=1 study | 0.380                   | 0.356           |
|              | Symptomatic patients only<br>n=2 studies           | 0.404                   |                 |

\*Comparing pooled resistance for difference in subgroup in hospital setting  
n=number of studies reporting on hospital acquired UTI

\*\*Middle East only; North America only
